# Supplementary material for: Neurosurgeons’ experiences of conducting and disseminating clinical research in low- and middle-income countries: a qualitative study protocol
Source: PubMed Central journal article supplement (PMC7430326; doi:10.1136/bmjopen-2020-038939), 2020-08-13
Supplement: bmjopen-2020-038939.draft_revisions.pdf [file bmjopen-2020-038939.draft_revisions.pdf]

# BMJ Open

BMJ Open is committed to open peer review. As part of this commitment we make the peer review history of every article we publish publicly available.

When an article is published we post the peer reviewers' comments and the authors' responses online. We also post the versions of the paper that were used during peer review. These are the versions that the peer review comments apply to.

The versions of the paper that follow are the versions that were submitted during the peer review process. They are not the versions of record or the final published versions. They should not be cited or distributed as the published version of this manuscript.

BMJ Open is an open access journal and the full, final, typeset and author-corrected version of record of the manuscript is available on our site with no access controls, subscription charges or pay-per-view fees (<http://bmjopen.bmj.com>).

If you have any questions on BMJ Open's open peer review process please email [info.bmjopen@bmj.com](mailto:info.bmjopen@bmj.com)

# BMJ Open

## Neurosurgeons' experiences of conducting and disseminating clinical research in low- and middle-income countries: A qualitative study protocol.

|                               |                                                                                                                                                                                                                                                                                                                                                                                                                                                                                                                                                                                                                                                                                                                                                                                                                                                                                                                                                                                                     |
|-------------------------------|-----------------------------------------------------------------------------------------------------------------------------------------------------------------------------------------------------------------------------------------------------------------------------------------------------------------------------------------------------------------------------------------------------------------------------------------------------------------------------------------------------------------------------------------------------------------------------------------------------------------------------------------------------------------------------------------------------------------------------------------------------------------------------------------------------------------------------------------------------------------------------------------------------------------------------------------------------------------------------------------------------|
| Journal:                      | <i>BMJ Open</i>                                                                                                                                                                                                                                                                                                                                                                                                                                                                                                                                                                                                                                                                                                                                                                                                                                                                                                                                                                                     |
| Manuscript ID                 | bmjopen-2020-038939                                                                                                                                                                                                                                                                                                                                                                                                                                                                                                                                                                                                                                                                                                                                                                                                                                                                                                                                                                                 |
| Article Type:                 | Protocol                                                                                                                                                                                                                                                                                                                                                                                                                                                                                                                                                                                                                                                                                                                                                                                                                                                                                                                                                                                            |
| Date Submitted by the Author: | 29-Mar-2020                                                                                                                                                                                                                                                                                                                                                                                                                                                                                                                                                                                                                                                                                                                                                                                                                                                                                                                                                                                         |
| Complete List of Authors:     | Whiffin, Charlotte; University of Derby, College of Health of Social Care; University of Cambridge, Division of Neuroscience<br>Smith, Brandon; University of Cambridge, NIHR Global Health Research Group on Neurotrauma, Department of Clinical Neurosciences<br>Esene, Ignatius ; University of Bamenda, Neurosurgery Division, Faculty of Health Sciences,<br>Karekezi, Claire; Rwanda Military Hospital, Department of Neurosurgery<br>Bashford, Tom; University of Cambridge , NIHR Global Health Research Group for Neurotrauma<br>Khan, Muhammad; Northwest School of Medicine and Northwest General Hospital and Research Centre, Neurosurgery; University of Cambridge, NIHR Global Health Research Group on Neurotrauma<br>Davi , Solla; University of São Paulo Department of Neurosciences and Behaviour Sciences<br>Hutchinson, Peter; University of Cambridge, Academic Neurosurgery<br>Kolias, Angelos; Addenbrooke's Hospital, University of Cambridge, Department of Neurosurgery |
| Keywords:                     | QUALITATIVE RESEARCH, NEUROSURGERY, Neurological injury < NEUROLOGY                                                                                                                                                                                                                                                                                                                                                                                                                                                                                                                                                                                                                                                                                                                                                                                                                                                                                                                                 |
|                               |                                                                                                                                                                                                                                                                                                                                                                                                                                                                                                                                                                                                                                                                                                                                                                                                                                                                                                                                                                                                     |

SCHOLARONE™  
Manuscripts

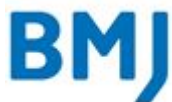

I, the Submitting Author has the right to grant and does grant on behalf of all authors of the Work (as defined in the below author licence), an exclusive licence and/or a non-exclusive licence for contributions from authors who are: i) UK Crown employees; ii) where BMJ has agreed a CC-BY licence shall apply, and/or iii) in accordance with the terms applicable for US Federal Government officers or employees acting as part of their official duties; on a worldwide, perpetual, irrevocable, royalty-free basis to BMJ Publishing Group Ltd ("BMJ") its licensees and where the relevant Journal is co-owned by BMJ to the co-owners of the Journal, to publish the Work in this journal and any other BMJ products and to exploit all rights, as set out in our [licence](#).

The Submitting Author accepts and understands that any supply made under these terms is made by BMJ to the Submitting Author unless you are acting as an employee on behalf of your employer or a postgraduate student of an affiliated institution which is paying any applicable article publishing charge ("APC") for Open Access articles. Where the Submitting Author wishes to make the Work available on an Open Access basis (and intends to pay the relevant APC), the terms of reuse of such Open Access shall be governed by a Creative Commons licence – details of these licences and which [Creative Commons](#) licence will apply to this Work are set out in our licence referred to above.

Other than as permitted in any relevant BMJ Author's Self Archiving Policies, I confirm this Work has not been accepted for publication elsewhere, is not being considered for publication elsewhere and does not duplicate material already published. I confirm all authors consent to publication of this Work and authorise the granting of this licence.

## Title Page

**Full Title:** Neurosurgeons' experiences of conducting and disseminating clinical research in low- and middle-income countries: A qualitative study protocol.

**SHORT STUDY TITLE:** Conducting and disseminating research in LMICs

**Authors:** Whiffin CJ<sup>1,2,3</sup>, Smith BS<sup>2,3</sup>, Esene IN<sup>3,4</sup>, Karekezi C<sup>5</sup>, Bashford T<sup>2,3</sup>, Khan M<sup>6</sup>, Solla DJF<sup>7</sup>, Hutchinson PJ<sup>2,3</sup>, Koliass AG<sup>2,3</sup>

### Author Affiliation:

<sup>1</sup> University of Derby, UK

<sup>2</sup> Division of Neurosurgery, Department of Clinical Neurosciences, Addenbrooke's Hospital & University of Cambridge, Cambridge, UK

<sup>3</sup> NIHR Global Health Research Group on Neurotrauma, University of Cambridge, Cambridge, UK

<sup>4</sup> Neurosurgery Division, Faculty of Health Sciences, University of Bamenda, Cameroon

<sup>5</sup> Rwanda Military Hospital, Department of Neurosurgery, Rwanda

<sup>6</sup> Northwest School of Medicine & Northwest General Hospital & Research Centre, Peshawar, Pakistan

<sup>7</sup> University of São Paulo, Brazil

Corresponding author

Dr Charlotte Whiffin

[c.whiffin@derby.ac.uk](mailto:c.whiffin@derby.ac.uk)

College of health and social care, University of Derby, Kedleston Road, Derby DE22 1GB, 07800664853

## ABSTRACT

**Introduction:** Low-and middle-income countries (LMICs) face the greatest burden of neurotrauma. However, most of the research published in scientific journals originates from high-income countries, suggesting those in LMICs are either not engaging in research, or are not publishing it. Evidence originating in high-income countries may not be generalisable to LMICs, therefore it is important to nurture research capacity in LMICs so that a relevant evidence base can be developed. However, little is published about specific challenges or contextual issues relevant to increasing research activity of neurosurgeons in LMICs. Therefore, the aim of this study was to understand neurosurgeons' experiences of, aspirations for and ability to, conduct and disseminate clinical research in low- and middle-income countries.

**Methods and analysis:** This is a pragmatic qualitative study situated within the naturalistic paradigm using focus groups and interviews with a purposive sample of neurosurgeons from LMICs. First, we will conduct asynchronous online focus groups with 36 neurosurgeons to broadly explore issues relevant to the study aim. Second, we will select 20 participants for follow-up semi-structured interviews to explore concepts in more depth and detail than could be achieved in the focus group. Interviews will be audio-recorded and transcribed verbatim. A thematic analysis will be conducted following Braun and Clarke's six stages and will be supported by NVIVO software.

**Ethics and dissemination:** The University of Cambridge Psychology Research Ethics Committee reviewed and approved this study in January 2020 (REF PRE.2020.006). Participants will provide informed consent, be able to withdraw at any time and will have their contributions kept

1  
2  
3 confidential. The findings of the study will be shared with relevant stakeholders and disseminated in  
4 conference presentations and journal publications.  
5

6 **Registration:** N/A  
7

8  
9 **Article Summary:**

10 **Strengths and limitations of this study**

- 11 • First qualitative study to explore the challenges of neurosurgeons conducting and
- 12 disseminating clinical research in LMICs
- 13 • Provides an in-depth exploration of neurosurgeons' understanding of how engagement in
- 14 research could be improved
- 15 • Knowledge generated from this study will inform recommendations to enhance the research
- 16 capacity of neurosurgeons in LMICs
- 17 • It will not be possible to represent all LMICs in this study
- 18 • Excluding non-English speaking neurosurgeons will mean any additional barriers that these
- 19 neurosurgeons may face in conducting and disseminating research will remain unexplored.  
20  
21

22  
23 **Key Words**

- 24 • Traumatic brain injury
- 25 • Neurosurgery
- 26 • Qualitative research
- 27 • Developing countries  
28  
29

30 **Word count:** 2291  
31

32  
33 **INTRODUCTION**

34  
35 In 2017 the UK Department of Health and Social Care provided over £160 million of funding for  
36 global health research<sup>1</sup>. From this funding the NIHR Global Health Research Group on Neurotrauma  
37 was established with the overall aim of improving outcomes from neurotrauma in low- and middle -  
38 income countries <sup>2</sup> (LMICs). In addition to improving outcomes, the group also aims to increase the  
39 participation of LMICs in high quality clinical research<sup>3</sup>. The low proportion of published scientific  
40 papers from authors in LMICs is stark <sup>4,5</sup>. The limited participation of LMICs in research contrasts  
41 sharply with their disproportionately high incidence of neurotrauma<sup>6</sup>. In a recent study of research  
42 productivity in LMICs, as evidenced by publication in journals, Servadei, et al. <sup>5</sup> found that only 4.52%  
43 of 6708 published reports had an LMICs affiliation. In a further bibliometric study Africa and  
44 Southeast Asia were found to be responsible for less than 3% of publication productivity<sup>7</sup>. If journal  
45 publication is a reliable indicator of the quality and quantity of research, then LMICs are severely  
46 underrepresented in an international context<sup>5</sup>. In addition, Koliaş, et al. <sup>3</sup> asserts that multicentre  
47 trials are typically conducted in high-income countries making generalisability of these studies to  
48 environments with different treatment practices particularly problematic. A recent review to  
49 identify randomised trials of neurosurgical procedures used in cranial and spinal neurosurgical  
50 practice found only 8.8% of studies (excluding China) were LMICs led studies<sup>8</sup>. Low-and middle-  
51 income countries need to develop an evidence-base that is relevant to the treatments and  
52 interventions accessible to them<sup>3,7</sup>. Nurturing an environment that promotes high quality  
53 neurotrauma research is a fundamental part of this.  
54  
55

56  
57 Little is written in the academic literature about the reasons why there are so few studies  
58 conducted, and/or published, by neurosurgeons in LMICs, although lack of time and resources are a  
59 likely factor <sup>5</sup>. More specifically Langer, et al. <sup>4</sup> suggested poor research production; poor  
60

1  
2  
3 preparation of manuscripts; poor access to scientific literature; poor participation in publication-  
4 related decision-making processes and bias of journals all exacerbate low engagement. However,  
5 there is little empirical data to underpin these assumptions, therefore it is important to understand  
6 this so that any recommendations for enhancing research capacity in the future are context specific  
7 and borne out of an in-depth understanding of the problem. A review by Franzen<sup>9</sup> examined health  
8 research capacity development in LMICs suggesting power relationships effected capacity  
9 development, that stronger links between research, policy and practice were required and that a  
10 systems response was necessary if capacity was to be improved. However, only 20.8% of the papers  
11 included in the review were sourced from empirical primary research.  
12  
13

#### 14 Aim & Objectives

15 The aim of this study is to understand neurosurgeons' experiences of, aspirations for, and ability to,  
16 conduct and disseminate clinical research in low- and middle-income countries.  
17  
18

#### 19 Objectives

- 20 1. Explore the types of clinical research neurotrauma physicians from low- and middle-  
21 income countries are engaged in.
- 22 2. Understand the contextual challenges to conducting and disseminating clinical research  
23 in low- and middle-income countries.
- 24 3. Identify ways in which research and dissemination activities can be facilitated in low-  
25 and middle-income countries.  
26  
27

## 28 METHODS and ANALYSIS

### 29 *Study design*

30 We propose an exploratory pragmatic qualitative study situated within the naturalistic paradigm.  
31 Pragmatic qualitative research, also referred to as descriptive or generic qualitative research, is  
32 particularly useful when little is known about a topic and when researching populations from other  
33 cultures<sup>10</sup>. Pragmatic qualitative studies are not philosophically informed allowing the study to be  
34 designed in a way that is feasible, achievable and appropriate for the aim of the study<sup>11</sup>. The  
35 naturalistic paradigm, explicated by Lincoln and Guba<sup>12</sup>, also known as the constructivist paradigm in  
36 more recent texts (although many authors still prefer this original description), reject methods which  
37 are reductionistic<sup>13</sup>. Naturalistic inquiry tries to stay true to the nature of the phenomena under  
38 investigation and commits to the existence of multiple realities and working with subjectivity<sup>14</sup>.  
39  
40  
41

### 42 *Data collection*

43 As there is little written in the empirical literature, we were cautious about developing an a priori  
44 interview schedule to guide data collection. Therefore, we have designed a study that will explore  
45 neurosurgeons' experiences within a focus group first as a means to understand the nature of the  
46 problem initially and then conduct semi-structured interviews with a smaller sample to explore the  
47 research question in more depth than may possible in a focus group setting. In addition, we propose  
48 collecting a small amount of demographic data.  
49  
50

51 Specific demographic data will be collected from each participant to include age, gender, country of  
52 residence, job title and experience. In addition, we will ascertain specific exposure to research  
53 training, research participation and the relevance of research to job role and job progression. This  
54 data is required if we are to interpret the context of the data correctly.  
55  
56

57 Online focus groups have a number of advantages over more traditional focus group formats<sup>15</sup>. First,  
58 they allow people who are in different geographical places to contribute to a group discussion where  
59 a face-to-face focus group is not possible<sup>16</sup>. Second, there is a heightened level of anonymity which  
60

may mean people feel more able to be honest and or share sensitive information. Third, data is immediately available without the necessity for transcription<sup>15</sup>. In addition, the asynchronous format allows participants the ability to contribute at a convenient place and time making the research more accessible to participants who may be in different time zones with competing demands on their time<sup>17</sup>.

The focus group questions were discussed with members of the research team, particularly those from LMICs, to ensure these were appropriate (Box One).

1. What are your personal experiences of conducting clinical research and what personal and/or organisational factors motivate you to conduct research?
2. What specific barriers are there to you conducting clinical research within your hospital?
3. In what ways is research shared between colleagues, the public, and the wider academic community?
4. What would help you to conduct and publish good clinical research?
5. What unique factors are there that should be considered to nurture research capacity in low and middle income countries?

Box One: Focus group questions

Selection of the online platform to facilitate the focus group was informed by a number of strict criteria informed by principles of safe data storage and accessibility. Each participant will be given a unique username and individually assigned password allowing them to contribute anonymously to the focus group. We propose three separate focus groups: Group One (lower income); Group two (lower-middle income); Group 3 (upper middle-income). We will try to have representation from a wide range of countries but will be affected by the number of people who respond to the initial call for participants. Questions will be posted online every seven-ten days in the order listed. Members of the UK research team, will regularly check the forum during this time, respond to direct questions if necessary, ask additional follow-up questions where appropriate or request clarification of points made.

Following completion of the online focus groups we will invite 20 participants to complete online video or telephone semi-structured interviews. We will select participants based on their demographic data and their contribution to the online focus group to ensure we capture a range of views and experiences. The specific interview schedule will be developed following preliminary analysis of the focus group data. The interviews will last approximately 30-60 minutes, will be conducted by the UK based research team and will be recorded with a digital recorder.

### Sample

Non-random sampling is used in qualitative studies and here we use a purposive approach. Persons eligible to participate in this study are neurosurgeons working in a country defined as low- or middle-income, self-declared fluency in written and spoken English, have access to, and able to use, a personal computer or smart phone and able to provide informed consent. Participants will be identified in countries participating in the NIHR Global Health Research Group on Neurotrauma listed in Box Two. However, new collaborators in the group, including Zimbabwe and the Philippines, and participants from institutions based in other LMICs, will be added if necessary, to achieve the required sample size.

- |             |            |
|-------------|------------|
| 1. BRAZIL   | 7. MYANMAR |
| 2. COLOMBIA | 8. NIGERIA |

|              |                  |
|--------------|------------------|
| 3. ETHIOPIA  | 9. PAKISTAN      |
| 4. INDIA     | 10. SOUTH AFRICA |
| 5. INDONESIA | 11. TANZANIA     |
| 6. MALAYSIA  | 12. ZAMBIA       |

#### Box Two: LMICs in the NIHR Global Health Research Group on Neurotrauma

Qualitative studies do not make any claims about generalisability so a sample size calculation is not appropriate. Instead qualitative studies use the concept of data saturation to assess the completeness of findings which is the point reached when researchers are confident that new data will reveal no new information<sup>18 19</sup>. In this study we aim to recruit 36 participants for the online focus groups and then 20 participants for the individual semi-structured follow-up interviews when we expect data saturation to be reached.

#### Data analysis

There will be three phases to analysis in this study mirroring the stages outlined under study design. Phase one will analyse the focus group data; phase two will analyse the semi-structured interview data and phase three will triangulate findings from all methods to determine final findings for the study.

Phases one and two will use a Braun and Clarke<sup>20</sup> thematic analysis (see Box Three) which is commonly used in pragmatic qualitative studies<sup>20 21</sup> that do not require “highly abstract rendering of data”<sup>22p.3</sup>. Audio files will be transcribed verbatim by a transcription service and checked for accuracy by the research team. Online focus groups will be downloaded from the online platform and transferred to a Microsoft Word file. Given the nature of the research question it would be wrong to enforce an a priori framework on the analysis. Analysis will therefore be inductive and in vivo coding will be used. Analysis will be supported by the use of NVIVO software allowing researchers to organise the data, share coding decisions and confirm the origins of interpretation.

1. Familiarising yourself with your data
2. Generate initial codes
3. Searching for themes
4. Reviewing themes
5. Defining and naming themes
6. Produce the report

#### Box Three: Braun and Clarke<sup>18</sup> thematic analysis framework

Phase three will involve triangulation of data obtained from interviews and focus groups. The benefits of data triangulation include developing a more comprehensive understanding of the phenomena under investigation through the use of multiple methods<sup>23</sup>.

#### Rigour

This study uses multiple methods and triangulation to increase its depth and accuracy of understanding. Preliminary findings from the focus group will be explored within the individual interviews which will increase credibility of the final findings. Critical reflexivity will also safeguard against naïve assumptions and possible hidden biases within the analysis. Peer debriefing and respondent validation will also be used in this study to increase rigour.



## ETHICS and DISSEMINATION

The University of Cambridge Psychology Research Ethics Committee reviewed this study in January 2020 (REF PRE.2020.006). The University of Cambridge is the sponsor and appropriate insurance is in place. Participants will be informed fully about the study methods, risks and benefits through the participant information Sheet. A cooling off period of 48 hours will be given to all those who express an interest in the study and then electronic consent will be taken. Participants will be able to withdraw at any time. Data cannot be withdrawn from the focus groups, however participants can request their data is withdrawn from the interviews for up to one week following their completion. After this period this data cannot be withdrawn as analysis will have commenced.

All information will be kept strictly confidential and comply to principles of UK data protection law and General Data Protection Regulation. Participants will be advised not to share any personal information in the online focus group. When the focus groups have been completed, we will anonymise the data prior to data analysis. Similarly, all interview data will be anonymised upon transcription. Participants will be told that anonymised quotes will be published in the findings of this study. We will also be seeking consent to disclose region and level of income associated with their country of origin against any quotes used in the publication of findings as this will be important to the contextual understanding of the study.

### Patient & Public involvement

Our research question asks for the views of neurosurgeons and therefore we do not intend to include patients or public in the design of, or data collection for, this study. However, we did ask for peer review of the study by collaborating members of the GHRGN. Their comments informed the final study design.

### Dissemination

Participants in this study will be sent a summary of the findings once analysis has been completed. The findings of the study will then be shared through the NIHR GHRGN network, and other relevant stakeholders, including the World Federation of Neurosurgical Societies. This study will also be disseminated in conference presentations and journal publications.

### Study Limitations

Generalisability of the findings may be limited, as we do not expect to have participating neurosurgeons from all LMICs. However, we hope to include participants from a variety of LMICs with broad spread in terms of geography and income status. Unfortunately, due to the resources available we had to exclude non-English speaking neurosurgeons. Any additional experiences that this specific population have in conducting and disseminating research will remain unexplored, therefore, we will need to be cautious in our final conclusions for this study.

### Conclusion

This is the first study, that we know of, to explore the challenges of neurosurgeons conducting and disseminating clinical research in LMICs. This qualitative study will provide a rich and in-depth understanding of how engagement in research could be improved for this population. This understanding will facilitate the development of appropriate recommendations with the aim of nurturing research capacity for neurosurgeons in LMICs in the future.

1  
2  
3  
4  
5  
6  
7  
8  
9  
10  
11  
12  
13  
14  
15  
16  
17  
18  
19  
20  
21  
22  
23  
24  
25  
26  
27  
28  
29  
30  
31  
32  
33  
34  
35  
36  
37  
38  
39  
40  
41  
42  
43  
44  
45  
46  
47  
48  
49  
50  
51  
52  
53  
54  
55  
56  
57  
58  
59  
60

For peer review only

## REFERENCES

1. Department of Health and Social Care. Government awards over £120 million for global health research 2017 [Available from: <https://www.gov.uk/government/news/government-awards-over-120-million-for-global-health-research> accessed 21/10/19.
2. Neurotrauma.world. NIHR Global Health Research Group on Neurotrauma 2016 [Available from: <http://neurotrauma.world/> accessed 21/10/2019.
3. Koliass AG, Rubiano AM, Figaji A, et al. Traumatic brain injury: global collaboration for a global challenge. *Lancet Neurol* 2019;18(2):136-37. doi: 10.1016/S1474-4422(18)30494-0 [published Online First: 2019/01/22]
4. Langer A, Diaz-Olavarrieta C, Berdichevsky K, et al. Why is research from developing countries underrepresented in international health literature, and what can be done about it? *Bull World Health Organ* 2004;82(10):802-3. [published Online First: 2005/01/13]
5. Servadei F, Tropeano MP, Spaggiari R, et al. Footprint of Reports From Low- and Low- to Middle-Income Countries in the Neurosurgical Data: A Study From 2015 to 2017. *World Neurosurg* 2019;130:e822-e30. doi: 10.1016/j.wneu.2019.06.230 [published Online First: 2019/07/12]
6. Mock C, Lormand JD, Goosen J, et al. Guidelines for essential trauma care. Geneva, 2004.
7. Tropeano M, Spaggiari R, Ileyassoff H, et al. A comparison of publication to TBI burden ratio of low- and middle-income countries versus high-income countries: how can we improve worldwide care of TBI? *Neurosurgical Focus* 2019;47(5):E5 p.1-6.
8. Griswold DP, Khan AA, Chao TE, et al. Neurosurgical Randomized Trials in Low- and Middle-Income Countries. *Neurosurgery* 2020 doi: 10.1093/neuros/nyaa049 [published Online First: 2020/03/15]
9. Franzen SR, Chandler C, Lang T. Health research capacity development in low and middle income countries: reality or rhetoric? A systematic meta-narrative review of the qualitative literature. *BMJ Open* 2017;7(1):e012332. doi: 10.1136/bmjopen-2016-012332 [published Online First: 2017/01/31]
10. Sullivan-Bolyai S, Bova C, Harper D. Developing and refining interventions in persons with health disparities: the use of qualitative description. *Nurs Outlook* 2005;53(3):127-33. doi: 10.1016/j.outlook.2005.03.005 [published Online First: 2005/07/01]
11. Smith J, Bekker H, Cheater F. Theoretical versus pragmatic design in qualitative research. *Nurse Res* 2011;18(2):39-51. doi: 10.7748/nr2011.01.18.2.39.c8283 [published Online First: 2011/02/16]
12. Lincoln YS, Guba EG. *Naturalistic inquiry*. Beverly Hills, Calif. ; London: Sage 1985.
13. Beuving J, de Vries G. *Doing Qualitative Research: The Craft of Naturalistic Inquiry*. Amsterdam: Amsterdam University Press, 2015.
14. Bowen GA. Naturalistic inquiry and the saturation concept: a research note. *Qualitative Research* 2008;8(1):137-52. doi: 10.1177/1468794107085301
15. Zwaanswijk M, van Dulmen S. Advantages of asynchronous online focus groups and face-to-face focus groups as perceived by child, adolescent and adult participants: a survey study. *BMC Res Notes* 2014;7:756. doi: 10.1186/1756-0500-7-756 [published Online First: 2014/10/25]
16. Harmsen IA, Mollema L, Ruiters RA, et al. Why parents refuse childhood vaccination: a qualitative study using online focus groups. *BMC Public Health* 2013;13:1183. doi: 10.1186/1471-2458-13-1183 [published Online First: 2013/12/18]
17. De Groot K, Maurits EEM, Francke AL. Attractiveness of working in home care: An online focus group study among nurses. *Health Soc Care Community* 2018;26(1):e94-e101. doi: 10.1111/hsc.12481 [published Online First: 2017/07/22]
18. Polit DF, Beck CT. *Resource manual for Nursing research : generating and assessing evidence for nursing practice*. Tenth edition. ed. Philadelphia: Lippincott Williams & Wilkins 2016.

- 1  
2  
3 19. Moser A, Korstjens I. Series: Practical guidance to qualitative research. Part 3: Sampling, data  
4 collection and analysis. *Eur J Gen Pract* 2018;24(1):9-18. doi:  
5 10.1080/13814788.2017.1375091 [published Online First: 2017/12/05]  
6  
7 20. Braun V, Clarke V. What can "thematic analysis" offer health and wellbeing researchers? *Int J*  
8 *Qual Stud Health Well-being* 2014;9:26152. doi: 10.3402/qhw.v9.26152 [published Online  
9 First: 2014/10/19]  
10  
11 21. Vaismoradi M, Turunen H, Bondas T. Content analysis and thematic analysis: Implications for  
12 conducting a qualitative descriptive study. *Nurs Health Sci* 2013;15(3):398-405. doi:  
13 10.1111/nhs.12048 [published Online First: 2013/03/14]  
14  
15 22. Bradshaw C, Atkinson S, Doody O. Employing a Qualitative Description Approach in Health Care  
16 Research. *Glob Qual Nurs Res* 2017;4:2333393617742282. doi: 10.1177/2333393617742282  
17 [published Online First: 2017/12/06]  
18  
19 23. Thurmond VA. The point of triangulation. *J Nurs Scholarsh* 2001;33(3):253-8. [published Online  
20 First: 2001/09/13]

### Author Contributions

21 PJA & AK conceived the research idea. CW, AK and BS designed the study. CW wrote the first draft of  
22 the protocol and paper for publication. TB, INE, CK, MK, DJFS all contributed to the study protocol  
23 and edited the final paper  
24

### Funding

25  
26 This work was supported by the NIHR Global Health Research Group on Neurotrauma  
27  
28

### Competing interests statement.

29  
30  
31 Angelos Koliaas and Peter Hutchinson are supported by the National Institute for Health  
32 Research (NIHR) Cambridge Biomedical Research Centre and the NIHR Global Health Research Group  
33 on Neurotrauma. Peter Hutchinson is also supported by a NIHR Research Professorship and the  
34 Royal College of Surgeons of England. The NIHR Global Health Research Group on Neurotrauma was  
35 commissioned by the United Kingdom NIHR using Official Development Assistance funding (project  
36 no. 16/137/105). The views expressed in this manuscript are those of the authors and are not  
37 necessarily those of the United Kingdom National Health Service, NIHR, or the Department of  
38 Health.  
39  
40  
41  
42  
43  
44  
45  
46  
47  
48  
49  
50  
51  
52  
53  
54  
55  
56  
57  
58  
59  
60

# BMJ Open

## Neurosurgeons' experiences of conducting and disseminating clinical research in low- and middle-income countries: A qualitative study protocol.

|                                 |                                                                                                                                                                                                                                                                                                                                                                                                                                                                                                                                                                                                                                                                                                                                                                                                                                                                                                                                                                                                     |
|---------------------------------|-----------------------------------------------------------------------------------------------------------------------------------------------------------------------------------------------------------------------------------------------------------------------------------------------------------------------------------------------------------------------------------------------------------------------------------------------------------------------------------------------------------------------------------------------------------------------------------------------------------------------------------------------------------------------------------------------------------------------------------------------------------------------------------------------------------------------------------------------------------------------------------------------------------------------------------------------------------------------------------------------------|
| Journal:                        | <i>BMJ Open</i>                                                                                                                                                                                                                                                                                                                                                                                                                                                                                                                                                                                                                                                                                                                                                                                                                                                                                                                                                                                     |
| Manuscript ID                   | bmjopen-2020-038939.R1                                                                                                                                                                                                                                                                                                                                                                                                                                                                                                                                                                                                                                                                                                                                                                                                                                                                                                                                                                              |
| Article Type:                   | Protocol                                                                                                                                                                                                                                                                                                                                                                                                                                                                                                                                                                                                                                                                                                                                                                                                                                                                                                                                                                                            |
| Date Submitted by the Author:   | 29-Apr-2020                                                                                                                                                                                                                                                                                                                                                                                                                                                                                                                                                                                                                                                                                                                                                                                                                                                                                                                                                                                         |
| Complete List of Authors:       | Whiffin, Charlotte; University of Derby, College of Health of Social Care; University of Cambridge, Division of Neuroscience<br>Smith, Brandon; University of Cambridge, NIHR Global Health Research Group on Neurotrauma, Department of Clinical Neurosciences<br>Esene, Ignatius ; University of Bamenda, Neurosurgery Division, Faculty of Health Sciences,<br>Karekezi, Claire; Rwanda Military Hospital, Department of Neurosurgery<br>Bashford, Tom; University of Cambridge , NIHR Global Health Research Group for Neurotrauma<br>Khan, Muhammad; Northwest School of Medicine and Northwest General Hospital and Research Centre, Neurosurgery; University of Cambridge, NIHR Global Health Research Group on Neurotrauma<br>Davi , Solla; University of São Paulo Department of Neurosciences and Behaviour Sciences<br>Hutchinson, Peter; University of Cambridge, Academic Neurosurgery<br>Kolias, Angelos; Addenbrooke's Hospital, University of Cambridge, Department of Neurosurgery |
| <b>Primary Subject Heading</b>: | Neurology                                                                                                                                                                                                                                                                                                                                                                                                                                                                                                                                                                                                                                                                                                                                                                                                                                                                                                                                                                                           |
| Secondary Subject Heading:      | Qualitative research, Surgery                                                                                                                                                                                                                                                                                                                                                                                                                                                                                                                                                                                                                                                                                                                                                                                                                                                                                                                                                                       |
| Keywords:                       | QUALITATIVE RESEARCH, NEUROSURGERY, Neurological injury < NEUROLOGY                                                                                                                                                                                                                                                                                                                                                                                                                                                                                                                                                                                                                                                                                                                                                                                                                                                                                                                                 |
|                                 |                                                                                                                                                                                                                                                                                                                                                                                                                                                                                                                                                                                                                                                                                                                                                                                                                                                                                                                                                                                                     |

SCHOLARONE™  
Manuscripts



I, the Submitting Author has the right to grant and does grant on behalf of all authors of the Work (as defined in the below author licence), an exclusive licence and/or a non-exclusive licence for contributions from authors who are: i) UK Crown employees; ii) where BMJ has agreed a CC-BY licence shall apply, and/or iii) in accordance with the terms applicable for US Federal Government officers or employees acting as part of their official duties; on a worldwide, perpetual, irrevocable, royalty-free basis to BMJ Publishing Group Ltd ("BMJ") its licensees and where the relevant Journal is co-owned by BMJ to the co-owners of the Journal, to publish the Work in this journal and any other BMJ products and to exploit all rights, as set out in our [licence](#).

The Submitting Author accepts and understands that any supply made under these terms is made by BMJ to the Submitting Author unless you are acting as an employee on behalf of your employer or a postgraduate student of an affiliated institution which is paying any applicable article publishing charge ("APC") for Open Access articles. Where the Submitting Author wishes to make the Work available on an Open Access basis (and intends to pay the relevant APC), the terms of reuse of such Open Access shall be governed by a Creative Commons licence – details of these licences and which [Creative Commons](#) licence will apply to this Work are set out in our licence referred to above.

Other than as permitted in any relevant BMJ Author's Self Archiving Policies, I confirm this Work has not been accepted for publication elsewhere, is not being considered for publication elsewhere and does not duplicate material already published. I confirm all authors consent to publication of this Work and authorise the granting of this licence.

## Title Page

**Full Title:** Neurosurgeons' experiences of conducting and disseminating clinical research in low- and middle-income countries: A qualitative study protocol.

**SHORT STUDY TITLE:** Conducting and disseminating research in LMICs

**Authors:** Whiffin CJ<sup>\*1 2 3</sup>, Smith BG<sup>\*2 3</sup>, Esene IN<sup>3 4</sup>, Karekezi C<sup>5</sup>, Bashford T<sup>2 3</sup>, Khan M<sup>6</sup>, Solla DJF<sup>7</sup>, Hutchinson PJ<sup>2 3</sup>, Koliass AG<sup>2 3</sup>

\*joint first authors

### Author Affiliation:

<sup>1</sup> University of Derby, UK

<sup>2</sup> Division of Neurosurgery, Department of Clinical Neurosciences, Addenbrooke's Hospital & University of Cambridge, Cambridge, UK

<sup>3</sup> NIHR Global Health Research Group on Neurotrauma, University of Cambridge, Cambridge, UK

<sup>4</sup> Neurosurgery Division, Faculty of Health Sciences, University of Bamenda, Cameroon

<sup>5</sup> Rwanda Military Hospital, Department of Neurosurgery, Rwanda

<sup>6</sup> Northwest School of Medicine & Northwest General Hospital & Research Centre, Peshawar, Pakistan

<sup>7</sup> University of São Paulo, Brazil

Corresponding author

Dr Charlotte Whiffin

[c.whiffin@derby.ac.uk](mailto:c.whiffin@derby.ac.uk)

College of health and social care, University of Derby, Kedleston Road, Derby DE22 1GB, 07800664853

## ABSTRACT

**Introduction:** Low-and middle-income countries (LMICs) face the greatest burden of neurotrauma. However, most of the research published in scientific journals originates from high-income countries, suggesting those in LMICs are either not engaging in research, or are not publishing it. Evidence originating in high-income countries may not be generalisable to LMICs, therefore it is important to nurture research capacity in LMICs so that a relevant evidence base can be developed. However, little is published about specific challenges or contextual issues relevant to increasing research activity of neurosurgeons in LMICs. Therefore, the aim of this study was to understand neurosurgeons' experiences of, aspirations for and ability to, conduct and disseminate clinical research in low- and middle-income countries.

**Methods and analysis:** This is a pragmatic qualitative study situated within the naturalistic paradigm using focus groups and interviews with a purposive sample of neurosurgeons from LMICs. First, we will conduct asynchronous online focus groups with 36 neurosurgeons to broadly explore issues relevant to the study aim. Second, we will select 20 participants for follow-up semi-structured interviews to explore concepts in more depth and detail than could be achieved in the focus group. Interviews will be audio-recorded and transcribed verbatim. A thematic analysis will be conducted following Braun and Clarke's six stages and will be supported by NVIVO software.

**Ethics and dissemination:** The University of Cambridge Psychology Research Ethics Committee reviewed and approved this study in January 2020 (REF PRE.2020.006). Participants will provide informed consent, be able to withdraw at any time and will have their contributions kept confidential. The findings of the study will be shared with relevant stakeholders and disseminated in conference presentations and journal publications.

**Registration:** N/A

#### Article Summary:

##### Strengths and limitations of this study

- First qualitative study to explore the challenges of neurosurgeons conducting and disseminating clinical research in LMICs
- Provides an in-depth exploration of neurosurgeons' understanding of how engagement in research could be improved
- Knowledge generated from this study will inform recommendations to enhance the research capacity of neurosurgeons in LMICs
- It will not be possible to represent all LMICs in this study
- Excluding non-English speaking neurosurgeons will mean any additional barriers that these neurosurgeons may face in conducting and disseminating research will remain unexplored.

##### Key Words

- Traumatic brain injury
- Neurosurgery
- Qualitative research
- Developing countries

**Word count: 2408**

## INTRODUCTION

In 2017 the UK Department of Health and Social Care provided over £160 million of funding for global health research<sup>1</sup>. From this funding the NIHR Global Health Research Group on Neurotrauma was established with the overall aim of improving outcomes from neurotrauma in low- and middle-income countries<sup>2</sup> (LMICs). In addition to improving outcomes, the group also aims to increase the participation of LMICs in high quality clinical research<sup>3</sup>. The low proportion of published scientific papers from authors in LMICs is stark<sup>4,5</sup>. The limited participation of LMICs in research contrasts sharply with their disproportionately high incidence of neurotrauma<sup>6</sup>. In a recent study of research productivity in LMICs, as evidenced by publication in journals, Servadei, et al.<sup>5</sup> found that only 4.52% of 6708 published reports had an LMICs affiliation. In a further bibliometric study Africa and Southeast Asia were found to be responsible for less than 3% of publication productivity<sup>7</sup>. If journal publication is a reliable indicator of the quality and quantity of research, then LMICs are severely underrepresented in an international context<sup>5</sup>. In addition, Koliass, et al.<sup>3</sup> asserts that multicentre trials are typically conducted in high-income countries making generalisability of these studies to environments with different treatment practices particularly problematic. A recent review to identify randomised trials of neurosurgical procedures used in cranial and spinal neurosurgical practice found only 8.8% of studies (excluding China) were LMICs led studies<sup>8</sup>. Low-and middle-income countries need to develop an evidence-base that is relevant to the treatments and interventions accessible to them<sup>3,7</sup>. Nurturing an environment that promotes high quality neurotrauma research is a fundamental part of this.



1  
2  
3 Little is written in the academic literature about the reasons why there are so few studies  
4 conducted, and/or published, by neurosurgeons in LMICs, although lack of time and resources are a  
5 likely factor<sup>5</sup>. More specifically Langer, et al.<sup>4</sup> suggested poor research production; poor  
6 preparation of manuscripts; poor access to scientific literature; poor participation in publication-  
7 related decision-making processes and bias of journals all exacerbate low engagement. However,  
8 there is little empirical data to underpin these assumptions, therefore it is important to understand  
9 this so that any recommendations for enhancing research capacity in the future are context specific  
10 and borne out of an in-depth understanding of the problem. A review by Franzen<sup>9</sup> examined health  
11 research capacity development in LMICs suggesting power relationships effected capacity  
12 development, that stronger links between research, policy and practice were required and that a  
13 systems response was necessary if capacity was to be improved. However, only 20.8% of the papers  
14 included in the review were sourced from empirical primary research.  
15  
16

### 17 Aim & Objectives

18 The aim of this study is to understand neurosurgeons' experiences of, aspirations for, and ability to,  
19 conduct and disseminate clinical research in low- and middle-income countries.  
20  
21

### 22 Objectives

- 23 1. Explore the types of clinical research neurotrauma physicians from low- and middle-  
24 income countries are engaged in.
- 25 2. Understand the contextual challenges to conducting and disseminating clinical research  
26 in low- and middle-income countries.
- 27 3. Identify ways in which research and dissemination activities can be facilitated in low-  
28 and middle-income countries.  
29

## 30 METHODS and ANALYSIS

### 31 Study design

32 We propose an exploratory pragmatic qualitative study situated within the naturalistic paradigm.  
33 Pragmatic qualitative research, also referred to as descriptive or generic qualitative research, is  
34 particularly useful when little is known about a topic and when researching populations from other  
35 cultures<sup>10</sup>. Pragmatic qualitative studies are not philosophically informed allowing the study to be  
36 designed in a way that is feasible, achievable and appropriate for the aim of the study<sup>11</sup>. The  
37 naturalistic paradigm, explicated by Lincoln and Guba<sup>12</sup>, also known as the constructivist paradigm in  
38 more recent texts (although many authors still prefer this original description), reject methods which  
39 are reductionistic<sup>13</sup>. Naturalistic inquiry tries to stay true to the nature of the phenomena under  
40 investigation and commits to the existence of multiple realities and working with subjectivity<sup>14</sup>.  
41  
42  
43  
44  
45

### 46 Data collection

47 As there is little written in the empirical literature, we were cautious about developing an a priori  
48 interview schedule to guide data collection. Therefore, we have designed a study that will explore  
49 neurosurgeons' experiences within a focus group first as a means to understand the nature of the  
50 problem initially and then conduct semi-structured interviews with a smaller sample to explore the  
51 research question in more depth than may possible in a focus group setting. In addition, we propose  
52 collecting a small amount of demographic data.  
53  
54

55 Specific demographic data will be collected from each participant to include age, gender, country of  
56 residence, job title and experience. In addition, we will ascertain specific exposure to research  
57 training, research participation and the relevance of research to job role and job progression. This  
58 data is required if we are to interpret the context of the data correctly.  
59  
60

1  
2  
3 Online focus groups have a number of advantages over more traditional focus group formats<sup>15</sup>. First,  
4 they allow people who are in different geographical places to contribute to a group discussion where  
5 a face-to-face focus group is not possible<sup>16</sup>. Second, there is a heightened level of anonymity which  
6 may mean people feel more able to be honest and or share sensitive information. Third, data is  
7 immediately available without the necessity for transcription<sup>15</sup>. In addition, the asynchronous  
8 format allows participants the ability to contribute at a convenient place and time making the  
9 research more accessible to participants who may be in different time zones with competing  
10 demands on their time<sup>17</sup>.  
11  
12

13 The focus group questions were discussed with members of the research team, particularly those  
14 from LMICs, to ensure these were appropriate (Box One).  
15

- |                                                                                                                                                                                                                                                                                                                                                                                                                                                                                                                                                                                                                                                                                              |
|----------------------------------------------------------------------------------------------------------------------------------------------------------------------------------------------------------------------------------------------------------------------------------------------------------------------------------------------------------------------------------------------------------------------------------------------------------------------------------------------------------------------------------------------------------------------------------------------------------------------------------------------------------------------------------------------|
| <ol style="list-style-type: none"><li>16 1. What are your personal experiences of conducting clinical research and what personal</li><li>17 and/or organisational factors motivate you to conduct research?</li><li>18 2. What specific barriers are there to you conducting clinical research within your hospital?</li><li>19 3. In what ways is research shared between colleagues, the public, and the wider academic</li><li>20 community?</li><li>21 4. What would help you to conduct and publish good clinical research?</li><li>22 5. What unique factors are there that should be considered to nurture research capacity in</li><li>23 low and middle income countries?</li></ol> |
|----------------------------------------------------------------------------------------------------------------------------------------------------------------------------------------------------------------------------------------------------------------------------------------------------------------------------------------------------------------------------------------------------------------------------------------------------------------------------------------------------------------------------------------------------------------------------------------------------------------------------------------------------------------------------------------------|

24  
25  
26  
27 Box One: Focus group questions  
28  
29

30 Selection of the online platform to facilitate the focus group was informed by a number of strict  
31 criteria informed by principles of safe data storage and accessibility. Each participant will be given a  
32 unique username and individually assigned password allowing them to contribute anonymously to  
33 the focus group. We propose three separate focus groups: Group One (lower income); Group two  
34 (lower-middle income); Group 3 (upper middle-income). We will try to have representation from a  
35 wide range of countries but will be affected by the number of people who respond to the initial call  
36 for participants. Questions will be posted online every seven-ten days in the order listed. Members  
37 of the UK research team, will regularly check the forum during this time, respond to direct questions  
38 if necessary, ask additional follow-up questions where appropriate or request clarification of points  
39 made.  
40

41  
42 Following completion of the online focus groups we will invite 20 participants to complete online  
43 video or telephone semi-structured interviews. We will select participants based on their  
44 demographic data and their contribution to the online focus group to ensure we capture a range of  
45 views and experiences. The specific interview schedule will be developed following preliminary  
46 analysis of the focus group data. The interviews will last approximately 30-60 minutes, will be  
47 conducted by the UK based research team and will be recorded with a digital recorder.  
48  
49

### 50 Sample

51 Non-random sampling is used in qualitative studies and here we use a purposive approach. Persons  
52 eligible to participate in this study are neurosurgeons working in a country defined as low- or  
53 middle-income, self-declared fluency in written and spoken English, have access to, and able to use,  
54 a personal computer or smart phone and able to provide informed consent. Participants will be  
55 identified in countries participating in the NIHR Global Health Research Group on Neurotrauma  
56 listed in Box Two. However, new collaborators in the group, including Zimbabwe and the Philippines,  
57 and participants from institutions based in other LMICs, will be added if necessary, to achieve the  
58 required sample size.  
59  
60

|              |                  |
|--------------|------------------|
| 1. BRAZIL    | 7. MYANMAR       |
| 2. COLOMBIA  | 8. NIGERIA       |
| 3. ETHIOPIA  | 9. PAKISTAN      |
| 4. INDIA     | 10. SOUTH AFRICA |
| 5. INDONESIA | 11. TANZANIA     |
| 6. MALAYSIA  | 12. ZAMBIA       |

#### Box Two: LMICs in the NIHR Global Health Research Group on Neurotrauma

Qualitative studies do not make any claims about generalisability so a sample size calculation is not appropriate. Instead qualitative studies use the concept of data saturation to assess the completeness of findings which is the point reached when researchers are confident that new data will reveal no new information<sup>18,19</sup>. In this study we aim to recruit 36 participants for the online focus groups and then 20 participants for the individual semi-structured follow-up interviews when we expect data saturation to be reached. If saturation is not reached, and increasing the sample size is feasible, we will request approval from the ethics committee to increase the sample to a more appropriate size.

#### Data analysis

There will be three phases to analysis in this study mirroring the stages outlined under study design. Phase one will analyse the focus group data; phase two will analyse the semi-structured interview data and phase three will triangulate findings from all methods to determine final findings for the study.

Phases one and two will use a Braun and Clarke<sup>20</sup> thematic analysis (see Box Three) which is commonly used in pragmatic qualitative studies<sup>20,21</sup> that do not require “highly abstract rendering of data”<sup>22p.3</sup>. Audio files will be transcribed verbatim by a transcription service and checked for accuracy by the research team. Online focus groups will be downloaded from the online platform and transferred to a Microsoft Word file. Given the nature of the research question it would be wrong to enforce an a priori framework on the analysis. Analysis will therefore be inductive and in vivo coding will be used. Analysis will be supported by the use of NVIVO software allowing researchers to organise the data, share coding decisions and confirm the origins of interpretation. CW will lead on the analysis, supported by BS in the initial coding and exploration of the data. CW is an experienced qualitative researcher and nurse academic with clinical experience of neurosurgery. BS is a PhD student and fourth year medical student who has undertaken training in qualitative methods and analysis. Once initial themes are identified these will be discussed with co-authors alongside supporting data. Themes will then be returned to participants so they can provide further insight. Any comments will be built into the process of defining and naming final themes.

|                                          |
|------------------------------------------|
| 1. Familiarising yourself with your data |
| 2. Generate initial codes                |
| 3. Searching for themes                  |
| 4. Reviewing themes                      |
| 5. Defining and naming themes            |
| 6. Produce the report                    |

#### Box Three: Braun and Clarke thematic analysis framework

1  
2  
3 Phase three will involve triangulation of data obtained from interviews and focus groups. The  
4 benefits of data triangulation include developing a more comprehensive understanding of the  
5 phenomena under investigation through the use of multiple methods<sup>23</sup>.  
6

### 7 **Rigour**

8 This study uses multiple methods and triangulation to increase its depth and accuracy of  
9 understanding. Preliminary findings from the focus group will be explored within the individual  
10 interviews which will increase credibility of the final findings. Critical reflexivity will also safeguard  
11 against naïve assumptions and possible hidden biases within the analysis. Peer debriefing and  
12 respondent validation will also be used in this study to increase rigour.  
13  
14

### 15 **ETHICS and DISSEMINATION**

16 The University of Cambridge Psychology Research Ethics Committee reviewed this study in January  
17 2020 (REF PRE.2020.006). The University of Cambridge is the sponsor and appropriate insurance is in  
18 place. Participants will be informed fully about the study methods, risks and benefits through the  
19 participant information Sheet. A cooling off period of 48 hours will be given to all those who express  
20 an interest in the study and then electronic consent will be taken. Participants will be able to  
21 withdraw at any time. Data cannot be withdrawn from the focus groups, however participants can  
22 request their data is withdrawn from the interviews for up to one week following their completion.  
23 After this period this data cannot be withdrawn as analysis will have commenced.  
24  
25

26 All information will be kept strictly confidential and comply to principles of UK data protection law  
27 and General Data Protection Regulation. Participants will be advised not to share any personal  
28 information in the online focus group. When the focus groups have been completed, we will  
29 anonymise the data prior to data analysis. Similarly, all interview data will be anonymised upon  
30 transcription. Participants will be told that anonymised quotes will be published in the findings of  
31 this study. We will also be seeking consent to disclose region and level of income associated with  
32 their country of origin against any quotes used in the publication of findings as this will be important  
33 to the contextual understanding of the study.  
34  
35

### 36 **Patient & Public involvement**

37 Our research question asks for the views of neurosurgeons and therefore we do not intend to  
38 include patients or public in the design of, or data collection for, this study. However, we did ask for  
39 peer review of the study by collaborating members of the GHRGN. Their comments informed the  
40 final study design.  
41  
42

### 43 **Dissemination**

44 Participants in this study will be sent a summary of the findings once analysis has been completed.  
45 The findings of the study will then be shared through the NIHR GHRGN network, and other relevant  
46 stakeholders, including the World Federation of Neurosurgical Societies. This study will also be  
47 disseminated in conference presentations and journal publications.  
48  
49

### 50 **Study Limitations**

51 Generalisability of the findings may be limited, as we do not expect to have participating  
52 neurosurgeons from all LMICs. However, we hope to include participants from a variety of LMICs  
53 with broad spread in terms of geography and income status. Unfortunately, due to the resources  
54 available we had to exclude non-English speaking neurosurgeons. Any additional experiences that  
55 this specific population have in conducting and disseminating research will remain unexplored,  
56 therefore, we will need to be cautious in our final conclusions for this study. However, given that this  
57 is the first study, that we know of, to explore the challenges of neurosurgeons conducting and  
58 disseminating clinical research in LMICs this qualitative study will provide a rich and in-depth  
59  
60

1  
2  
3 understanding of how engagement in research could be improved for this population. This  
4 understanding will facilitate the development of appropriate recommendations with the aim of  
5 nurturing research capacity for neurosurgeons in LMICs in the future.  
6  
7  
8  
9  
10  
11  
12  
13  
14  
15  
16  
17  
18  
19  
20  
21  
22  
23  
24  
25  
26  
27  
28  
29  
30  
31  
32  
33  
34  
35  
36  
37  
38  
39  
40  
41  
42  
43  
44  
45  
46  
47  
48  
49  
50  
51  
52  
53  
54  
55  
56  
57  
58  
59  
60

For peer review only

## REFERENCES

1. Department of Health and Social Care. Government awards over £120 million for global health research 2017 [Available from: <https://www.gov.uk/government/news/government-awards-over-120-million-for-global-health-research> accessed 21/10/19.
2. Neurotrauma.world. NIHR Global Health Research Group on Neurotrauma 2016 [Available from: <http://neurotrauma.world/> accessed 21/10/2019.
3. Koliass AG, Rubiano AM, Figaji A, et al. Traumatic brain injury: global collaboration for a global challenge. *Lancet Neurol* 2019;18(2):136-37. doi: 10.1016/S1474-4422(18)30494-0 [published Online First: 2019/01/22]
4. Langer A, Diaz-Olavarrieta C, Berdichevsky K, et al. Why is research from developing countries underrepresented in international health literature, and what can be done about it? *Bull World Health Organ* 2004;82(10):802-3. [published Online First: 2005/01/13]
5. Servadei F, Tropeano MP, Spaggiari R, et al. Footprint of Reports From Low- and Low- to Middle-Income Countries in the Neurosurgical Data: A Study From 2015 to 2017. *World Neurosurg* 2019;130:e822-e30. doi: 10.1016/j.wneu.2019.06.230 [published Online First: 2019/07/12]
6. Mock C, Lormand JD, Goosen J, et al. Guidelines for essential trauma care. Geneva, 2004.
7. Tropeano M, Spaggiari R, Ileyassoff H, et al. A comparison of publication to TBI burden ratio of low- and middle-income countries versus high-income countries: how can we improve worldwide care of TBI? *Neurosurgical Focus* 2019;47(5):E5 p.1-6.
8. Griswold DP, Khan AA, Chao TE, et al. Neurosurgical Randomized Trials in Low- and Middle-Income Countries. *Neurosurgery* 2020 doi: 10.1093/neuros/nyaa049 [published Online First: 2020/03/15]
9. Franzen SR, Chandler C, Lang T. Health research capacity development in low and middle income countries: reality or rhetoric? A systematic meta-narrative review of the qualitative literature. *BMJ Open* 2017;7(1):e012332. doi: 10.1136/bmjopen-2016-012332 [published Online First: 2017/01/31]
10. Sullivan-Bolyai S, Bova C, Harper D. Developing and refining interventions in persons with health disparities: the use of qualitative description. *Nurs Outlook* 2005;53(3):127-33. doi: 10.1016/j.outlook.2005.03.005 [published Online First: 2005/07/01]
11. Smith J, Bekker H, Cheater F. Theoretical versus pragmatic design in qualitative research. *Nurse Res* 2011;18(2):39-51. doi: 10.7748/nr2011.01.18.2.39.c8283 [published Online First: 2011/02/16]
12. Lincoln YS, Guba EG. *Naturalistic inquiry*. Beverly Hills, Calif. ; London: Sage 1985.
13. Beuving J, de Vries G. *Doing Qualitative Research: The Craft of Naturalistic Inquiry*. Amsterdam: Amsterdam University Press, 2015.
14. Bowen GA. Naturalistic inquiry and the saturation concept: a research note. *Qualitative Research* 2008;8(1):137-52. doi: 10.1177/1468794107085301
15. Zwaanswijk M, van Dulmen S. Advantages of asynchronous online focus groups and face-to-face focus groups as perceived by child, adolescent and adult participants: a survey study. *BMC Res Notes* 2014;7:756. doi: 10.1186/1756-0500-7-756 [published Online First: 2014/10/25]
16. Harmsen IA, Mollema L, Ruiters RA, et al. Why parents refuse childhood vaccination: a qualitative study using online focus groups. *BMC Public Health* 2013;13:1183. doi: 10.1186/1471-2458-13-1183 [published Online First: 2013/12/18]
17. De Groot K, Maurits EEM, Francke AL. Attractiveness of working in home care: An online focus group study among nurses. *Health Soc Care Community* 2018;26(1):e94-e101. doi: 10.1111/hsc.12481 [published Online First: 2017/07/22]
18. Polit DF, Beck CT. *Resource manual for Nursing research : generating and assessing evidence for nursing practice*. Tenth edition. ed. Philadelphia: Lippincott Williams & Wilkins 2016.



- 1  
2  
3 19. Moser A, Korstjens I. Series: Practical guidance to qualitative research. Part 3: Sampling, data  
4 collection and analysis. *Eur J Gen Pract* 2018;24(1):9-18. doi:  
5 10.1080/13814788.2017.1375091 [published Online First: 2017/12/05]  
6  
7 20. Braun V, Clarke V. What can "thematic analysis" offer health and wellbeing researchers? *Int J*  
8 *Qual Stud Health Well-being* 2014;9:26152. doi: 10.3402/qhw.v9.26152 [published Online  
9 First: 2014/10/19]  
10  
11 21. Vaismoradi M, Turunen H, Bondas T. Content analysis and thematic analysis: Implications for  
12 conducting a qualitative descriptive study. *Nurs Health Sci* 2013;15(3):398-405. doi:  
13 10.1111/nhs.12048 [published Online First: 2013/03/14]  
14  
15 22. Bradshaw C, Atkinson S, Doody O. Employing a Qualitative Description Approach in Health Care  
16 Research. *Glob Qual Nurs Res* 2017;4:2333393617742282. doi: 10.1177/2333393617742282  
17 [published Online First: 2017/12/06]  
18  
19 23. Thurmond VA. The point of triangulation. *J Nurs Scholarsh* 2001;33(3):253-8. [published Online  
20 First: 2001/09/13]

### Author Contributions

21 PJH & AK conceived the research idea. CW, AK and BS designed the study. CW wrote the first draft of  
22 the protocol and paper for publication. TB, INE, CK, MK, DJFS all contributed to the study protocol  
23 and edited the final paper  
24

### Funding

25  
26 This work was supported by the NIHR Global Health Research Group on Neurotrauma  
27  
28

### Competing interests statement.

29  
30  
31 Angelos Kolias and Peter Hutchinson are supported by the National Institute for Health  
32 Research (NIHR) Cambridge Biomedical Research Centre and the NIHR Global Health Research Group  
33 on Neurotrauma. Peter Hutchinson is also supported by a NIHR Research Professorship and the  
34 Royal College of Surgeons of England. The NIHR Global Health Research Group on Neurotrauma was  
35 commissioned by the United Kingdom NIHR using Official Development Assistance funding (project  
36 no. 16/137/105). The views expressed in this manuscript are those of the authors and are not  
37 necessarily those of the United Kingdom National Health Service, NIHR, or the Department of  
38 Health. Drs Esene, Karekezi, Khan, Solla and Kolias are members of the Young Neurosurgeons  
39 committee of the World Federation of Neurosurgical Societies. The committee is supporting this  
40 project.  
41  
42  
43  
44  
45  
46  
47  
48  
49  
50  
51  
52  
53  
54  
55  
56  
57  
58  
59  
60
